# Supplementary material for: Mechanism- and Immune Landscape-Based Ranking of Therapeutic Responsiveness of 22 Major Human Cancers to Next Generation Anti-CTLA-4 Antibodies
Source: PubMed Central journal article supplement (PMC7073233; doi:10.3390/cancers12020284), 2020-01-24
Supplement: cancers-12-00284-s001.pdf [file cancers-12-00284-s001.pdf]

## Supplemental information

Supplemental Table S1. Patient information, related to Figure 6.

| <b>Patient</b> | <b>Sex</b> | <b>Age</b> | <b>Stage</b> | <b>NSCLC Type</b>       |
|----------------|------------|------------|--------------|-------------------------|
| P1             | Male       | 66         | IIIA         | Adenocarcinoma          |
| P2             | Female     | 69         | IB           | Squamous cell carcinoma |
| P3             | Male       | 67         | IA3          | Adenocarcinoma          |
| P4             | Female     | 62         | IA3          | Adenocarcinoma          |
| P5             | Male       | 59         | IB           | Squamous cell carcinoma |
| P6             | Male       | 50         | IA           | Adenocarcinoma          |
| P7             | Male       | 66         | IIIA         | Squamous cell carcinoma |
| P8             | Female     | 59         | IIIA         | Adenocarcinoma          |
| P9             | Male       | 56         | IIB          | Squamous cell carcinoma |

Supplementary Figure 1

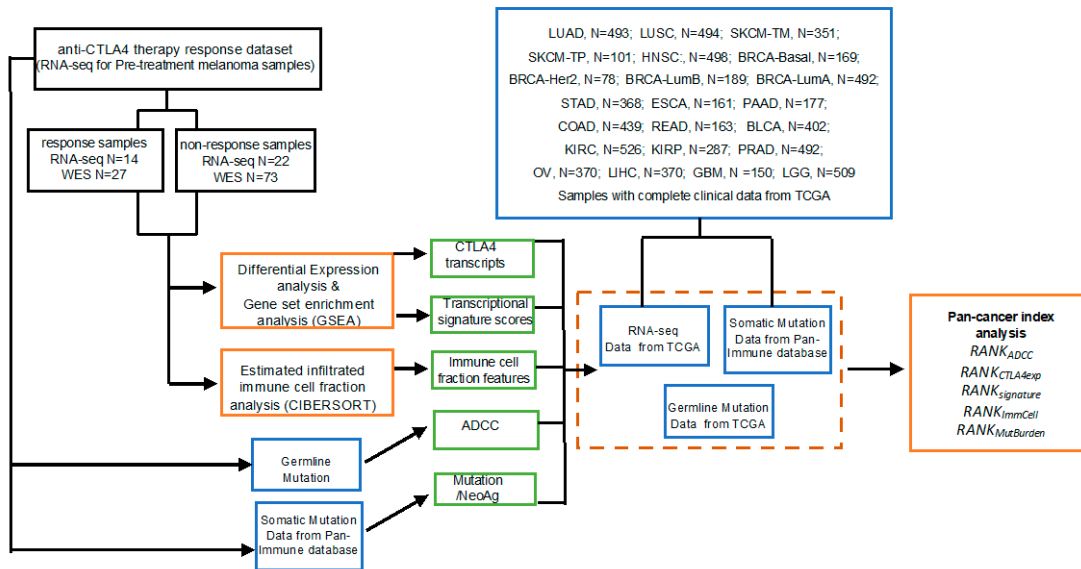

**Supplemental Figure S1. Diagram of the strategy to rank human cancer for their responsiveness to anti-CTLA-4 antibody treatment.** We first identified attributes of therapeutic response of anti-CTLA-4 antibodies based on a CTLA-4 response database [33], taking into consideration the newly identified mechanism of action by ant-CTLA-4 antibodies and analysis performed by another group on *FCGR3A* polymorphism and responsiveness to Ipilimumab. The human cancer types were ranked based on the median value of each attributes. The rankings of the five attributes were then weighted to yield a final ranking.

Supplementary Figure 2

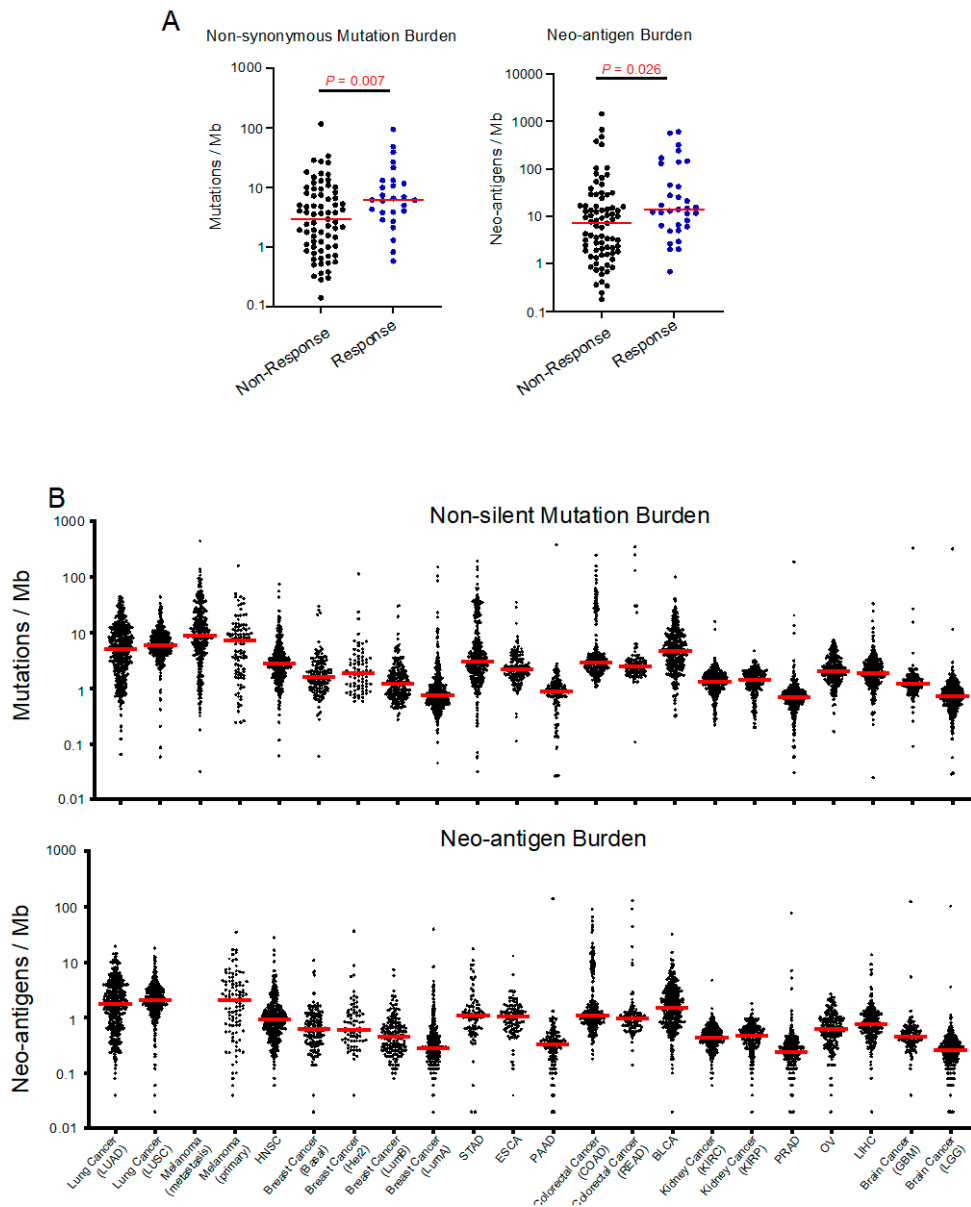

**Supplemental Figure S2. Mutational burden varied across cancers from TCGA. (A)**

Distribution plot of non-synonymous mutation count and neo-antigen count among anti CTLA-4 therapy responder and non-responder samples. (B) Distribution plot shows mutational burden and neoantigen counts across 21 cancer types of human cancer. The neoantigen counts for metastatic melanoma was unavailable.

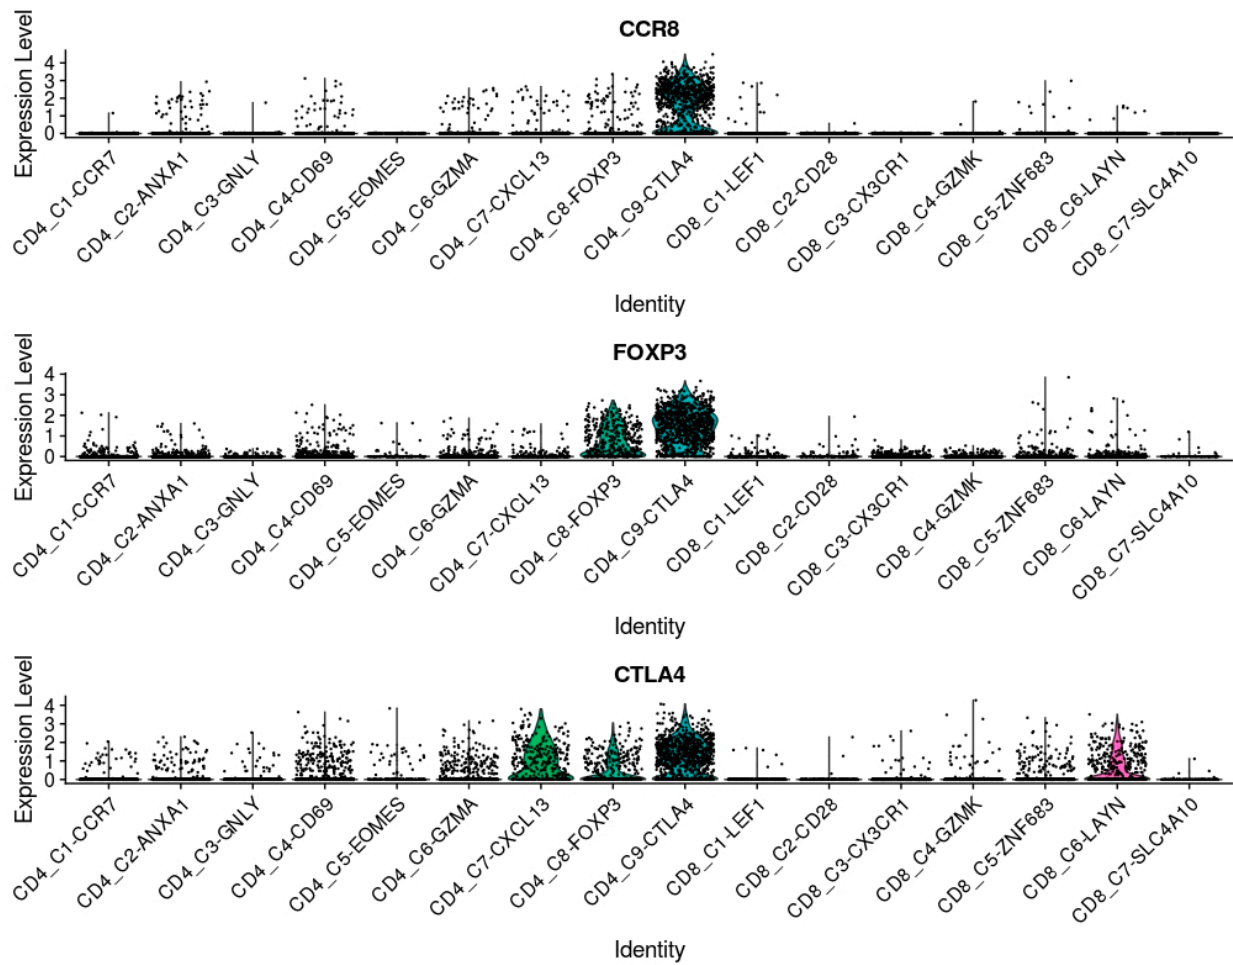

Supplemental Figure S3. **CCR8 is a marker for activated Treg that express high levels of CTLA-4 and FOXP3.** Data shown are re-analysis of scRNAseq data from Guo et al [36]. Related to Figure 6.
